# Supplementary material for: Anandamide Metabolites Protect against Seizures through the TRP Channel Water Witch in Drosophila melanogaster
Source: PubMed Central journal article supplement — Cell Rep. Author manuscript; Available in PMC 2022 Jun 2. (PMC9161705; doi:10.1016/j.celrep.2020.107710), 2020-06-02
Supplement: NIHMS1808928-supplement-1.pdf [file NIHMS1808928-supplement-1.pdf]

**Cell Reports, Volume 31**

**Supplemental Information**

**Anandamide Metabolites Protect  
against Seizures through the TRP Channel  
Water Witch in *Drosophila melanogaster***

**Jack A. Jacobs and Amita Sehgal**

a

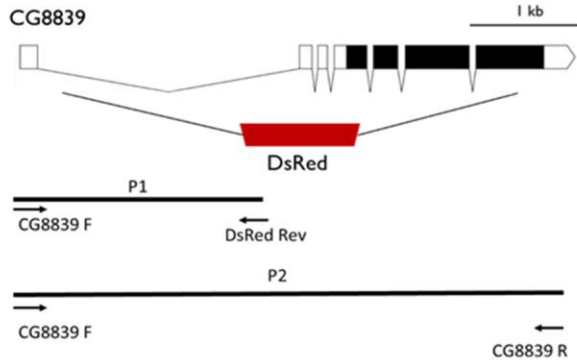

b

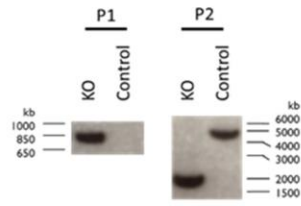

c

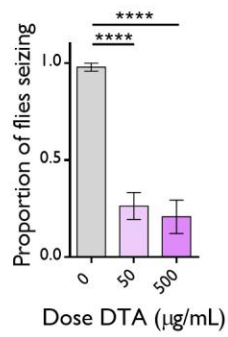

d

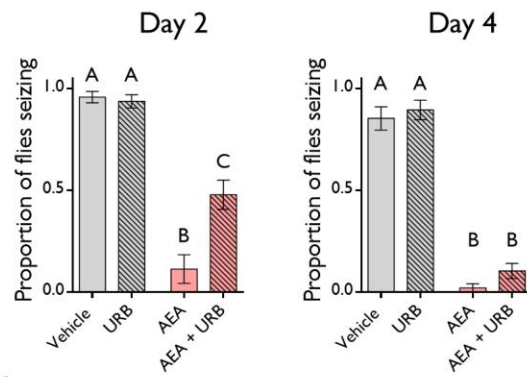

e

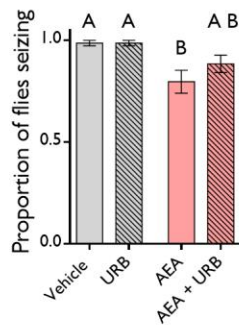

f

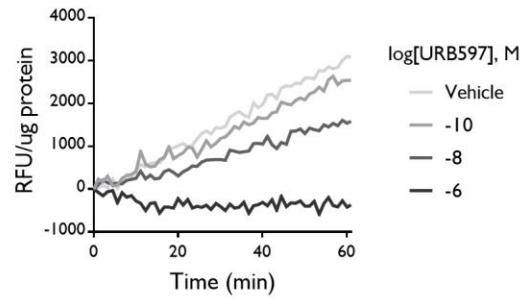

g

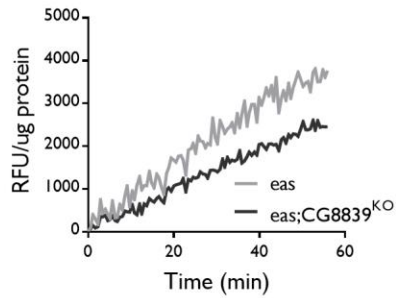

h

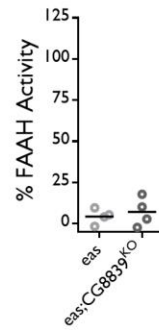

i

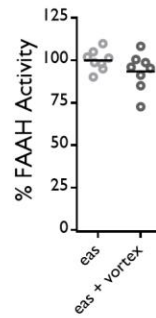

Supplemental Figure S1. Metabolites mediate the anticonvulsant effect of AEA. Related to Figure 2. **a)** CG8839 KO flies were generated by replacing the CG8839 coding region with a DsRed marker. **b)** PCR of genomic DNA confirms that DsRed was incorporated into deleted region of CG8839 by HDR in *CG8839<sup>KO</sup>* flies but not in controls. See materials and methods for primer sequences. **c)** 50 and 500  $\mu\text{g/mL}$  DTA feeding protects against seizures in *eas* flies.  $n=12$  vials/group. ANOVA with Tukey's post-hoc analysis. \*\*\*\* $P\leq 0.0001$  **d)** Co-feeding 50  $\mu\text{g/mL}$  URB597 with 20  $\mu\text{g/mL}$  AEA reduces the protective effect of AEA in *tko<sup>25t</sup>* flies after 2 days but not after 4 days of feeding.  $n=11-12$  vials/group. ANOVA with Tukey's post-hoc analysis. Means with different letters are significantly different (\* $P\leq 0.05$ ). **e)** Co-feeding 50  $\mu\text{g/mL}$  URB597 with 200  $\mu\text{g/mL}$  AEA does not reduce the protective effect of AEA in *bss<sup>l</sup>* flies after 4 days of feeding.  $n=11-12$  vials/group. ANOVA with Tukey's post-hoc analysis. Means with different letters are significantly different (\* $P\leq 0.05$ ). **f)** Representative data from FAAH experiments analyzed in Fig. 2e. **g)** Representative data from FAAH experiments analyzed in Fig. 2f. **h)** 1  $\mu\text{M}$  URB597 inhibits FAAH activity in both control and *CG8839<sup>KO</sup>* flies. % FAAH activity normalized to vehicle treated homogenates for each sample.  $n=4$  samples/genotype, 2 technical replicates/sample. Unpaired t-test. **i)** FAAH activity is not changed 15 minutes after seizure induction. % FAAH activity normalized to no vortex control FAAH activity for each experiment.  $n=8$  samples/group, 3 technical replicates/sample. Unpaired t-test. Bar graph data are presented as mean  $\pm$  s.e.m.

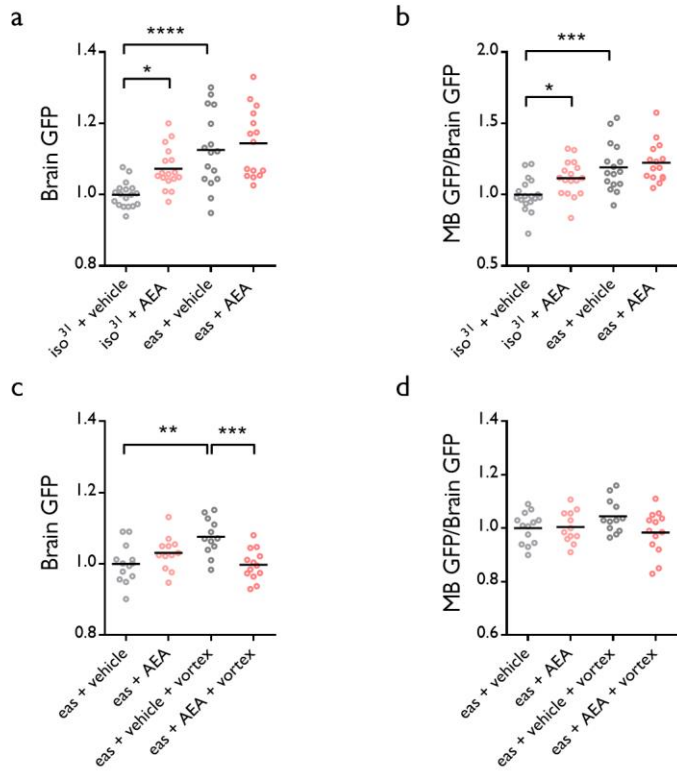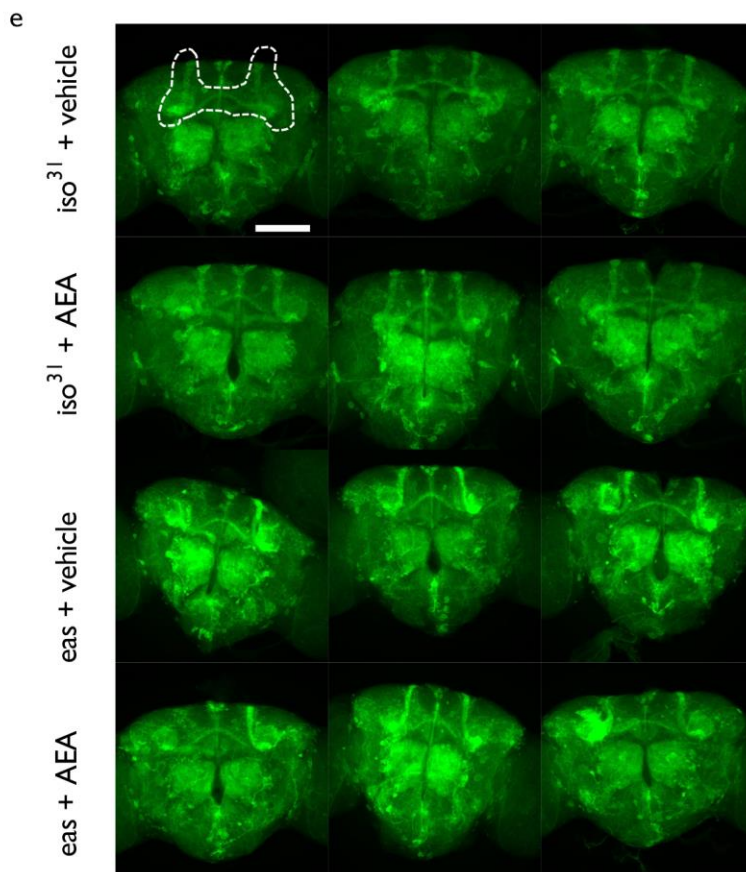

Figure S2. Anandamide increases baseline calcium and protects against stimulus-induced calcium elevations. Related to Figure 3. **a)** 20  $\mu\text{g/mL}$  AEA feeding increases mean GFP signal in  $\text{iso}^{31}$  fly brains. Brains from vehicle-fed *eas* flies have higher GFP than brains from vehicle-fed  $\text{iso}^{31}$  flies.  $n=15-18$  brains/group. ANOVA with Sidak's multiple comparison.  $*P\leq 0.05$  \*\*\*\* $P\leq 0.0001$ . **b)** 20  $\mu\text{g/mL}$  AEA feeding increases MB-specific GFP in  $\text{iso}^{31}$  fly brains. Brains from vehicle-fed *eas* flies have higher MB-specific GFP than brains from vehicle-fed  $\text{iso}^{31}$  flies.  $n=15-18$  brains/group. ANOVA with Sidak's multiple comparison.  $*P\leq 0.05$  \*\*\* $P\leq 0.001$ . **c)** 10-second vortex induces an increase in GFP in brains from vehicle-fed *eas* flies but not in brains from AEA-fed *eas* flies.  $n=12-13$  brains/group. ANOVA with Sidak's multiple comparison.  $*P\leq 0.05$  \*\* $P\leq 0.01$ . **d)** MB-specific GFP is similar in all *eas* groups.  $n=12-13$  brains/group. ANOVA with Sidak's multiple comparison. **e)** Representative images of fly brains from Fig. S2a-b. White dotted line outlines MB. White scale bar indicates 100  $\mu\text{m}$ .

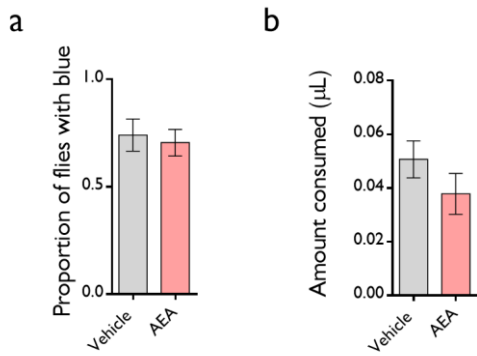

Figure S3. Flies consume AEA during acute exposure. Related to Figure 4. **a)** A similar proportion of flies consume vehicle and 2  $\mu\text{g/mL}$  AEA food during an acute, 1-hour exposure after 16 hours of starvation.  $n=10$  vials/group. Unpaired t-test. **b)** 2  $\mu\text{g/mL}$  AEA does not affect total amount consumed.  $n=10$  vials/group. Unpaired t-test. Bar graph data are presented as mean  $\pm$  s.e.m.

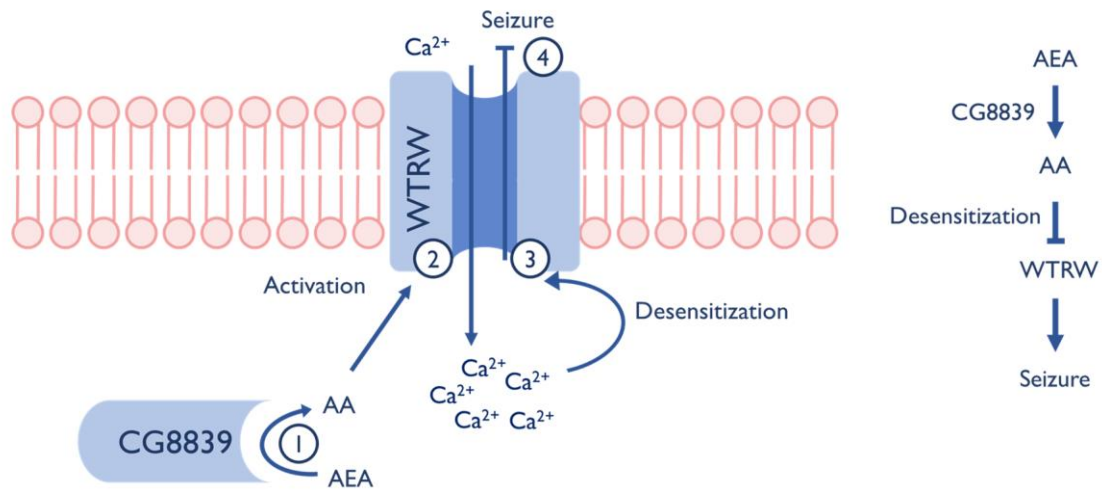

Figure S4. Hypothesized model of seizure protection by AEA metabolites. Related to Figures 1-4. **1)** AA is produced by catabolism of AEA by CG8839. **2)** AA activates WTRW causing Ca<sup>2+</sup> influx. **3)** Chronic activation desensitizes WTRW. **4)** Desensitization of WTRW blocks seizure initiation.
